# Supplementary material for: Changes in Representation of Thalamic Projection Neurons within Prefrontal-Thalamic-Hippocampal Circuitry in a Rat Model of Third Trimester Binge Drinking
Source: MDPI journal article supplement (doi:10.3390/brainsci11030323), 2021-03-04
Supplement: s1 [file s1]

## Supplementary Material

### S.1. Analysis of weight during postnatal treatment period and in adulthood.

Weights of the AE treatment group diverged from control levels after the start of the treatment period (Figure S1a, Table S1). While such weight differences are commonly observed in studies of developmental alcohol exposure [32, 73, 74], weights no longer differed in adulthood (i.e., at time of AAVrg-CAG injection; Figure S1b, Table S1).

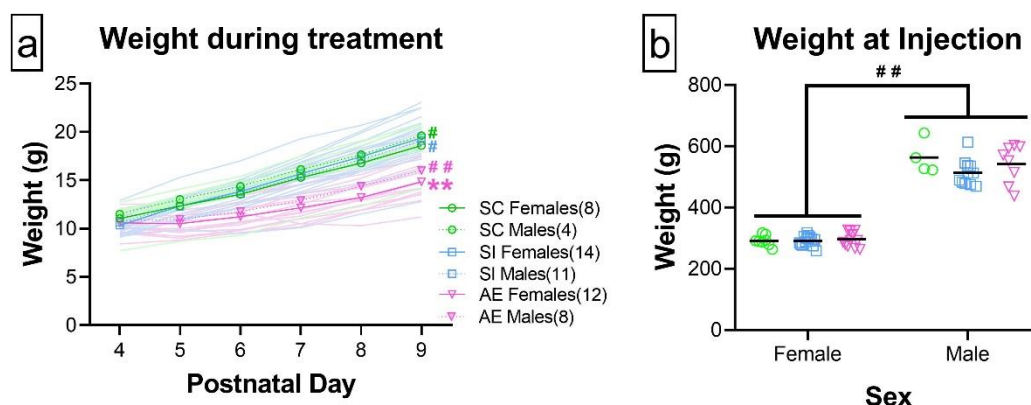

**Figure S1.** Weight of experimental animals throughout the current study. (a) Weight of animals throughout the early postnatal treatment period (postnatal days (PD) 4–9). Bold lines and symbols represent group means while lighter individual lines represent each individual animal. \*  $p < 0.050$  relative to SI procedural control group, #  $p < 0.050$  relative to females of same treatment group, ##  $p < 0.010$  relative to females of same treatment group, (b) Weight of animals at time of AAVrg-CAG injection in adulthood (PD 105–139). Black bars represent mean within treatment group with symbols representing each individual animal. ##  $p < 0.010$  relative to females (main effect of sex).

**Table S1.** Regression table for linear mixed-effects model examining weight during early postnatal treatment period (left) and in adulthood at time of AAVrg-CAG injection (right). Random effects for the treatment model were animal (random-intercept) and litter (random-intercept and random-slope across days of treatment). Litter was the only random effect in the model examining the adult timepoint (random-intercept).

| Predictors          | Estimates | Weight (PD4–9) |        |        | Estimates | Weight (adulthood) |        |       |
|---------------------|-----------|----------------|--------|--------|-----------|--------------------|--------|-------|
|                     |           | 95% CI         | p      | df     |           | 95% CI             | p      | df    |
| (Intercept)         | 10.52     | 9.64 to 11.40  | <0.001 | 325.00 | 294.57    | 272.03 to 317.10   | <0.001 | 49.00 |
| SC                  | 0.42      | -1.27 to 2.11  | 0.624  | 325.00 | 3.54      | -39.00 to 46.08    | 0.870  | 49.00 |
| AE                  | -0.38     | -1.30 to 0.54  | 0.421  | 325.00 | 7.31      | -17.99 to 32.60    | 0.571  | 49.00 |
| Male                | 0.10      | -0.84 to 1.03  | 0.839  | 325.00 | 219.81    | 194.13 to 245.50   | <0.001 | 49.00 |
| # of days since PD4 | 1.78      | 1.58 to 1.97   | <0.001 | 325.00 |           |                    |        |       |
| SC * Male           | 0.32      | -1.40 to 2.04  | 0.714  | 325.00 | 45.33     | -1.88 to 92.54     | 0.060  | 49.00 |

|                                                      |              |                                                   |                  |               |       |                              |       |       |
|------------------------------------------------------|--------------|---------------------------------------------------|------------------|---------------|-------|------------------------------|-------|-------|
| AE * Male                                            | 0.05         | -1.39 to 1.50                                     | 0.942            | 325.00        | 22.93 | -16.67 to 62.52              | 0.256 | 49.00 |
| SC * # of days since PD4                             | -0.29        | -0.69 to 0.11                                     | 0.157            | 325.00        |       |                              |       |       |
| AE * # of days since PD4                             | <b>-0.89</b> | <b>-1.00 to -0.78</b>                             | <b>&lt;0.001</b> | <b>325.00</b> |       |                              |       |       |
| Male * # of days since PD4                           | <b>-0.12</b> | <b>-0.24 to -0.01</b>                             | <b>0.029</b>     | <b>325.00</b> |       |                              |       |       |
| SC * Male * # of days since PD4                      | <b>0.24</b>  | <b>0.04 to 0.45</b>                               | <b>0.021</b>     | <b>325.00</b> |       |                              |       |       |
| AE * Male * # of days since PD4                      | <b>0.36</b>  | <b>0.19 to 0.53</b>                               | <b>&lt;0.001</b> | <b>325.00</b> |       |                              |       |       |
| Random Effects                                       |              |                                                   |                  |               |       |                              |       |       |
| $\sigma^2$                                           |              | 0.34                                              |                  |               |       | 1044.17                      |       |       |
| $\tau_{00}$                                          |              | 1.21 <small>Animal</small>                        |                  |               |       | 382.89 <small>Litter</small> |       |       |
|                                                      |              | 0.69 <small>Litter</small>                        |                  |               |       |                              |       |       |
| $\tau_{11}$                                          |              | 0.06 <small>Litter.DaysSinceStartOfDosing</small> |                  |               |       |                              |       |       |
| $\rho_{01}$                                          |              | 0.12 <small>Litter</small>                        |                  |               |       |                              |       |       |
| ICC                                                  |              | 0.88                                              |                  |               |       | 0.27                         |       |       |
| N                                                    |              | 9 <small>Litter</small>                           |                  |               |       | 9 <small>Litter</small>      |       |       |
|                                                      |              | 57 <small>Animal</small>                          |                  |               |       |                              |       |       |
| Observations                                         |              | 342                                               |                  |               |       | 57                           |       |       |
| Marginal R <sup>2</sup> / Conditional R <sup>2</sup> |              | 0.721 / 0.967                                     |                  |               |       | 0.906 / 0.931                |       |       |

S.2. Analysis of age of animals at injection, incubation time of AAVrg-CAG prior to tissue fixation, injection locations, injection diffusion volumes.

S.2.1. Age at time of AAVrg-CAG injection and duration of AAVrg-CAG incubation prior to tissue fixation

Animals were counterbalanced such that there were no significant associations between either age at AAVrg-CAG injection or the amount of time between AAVrg-CAG injection and tissue perfusion and postnatal treatment or sex (Figure S2a, Table S2).

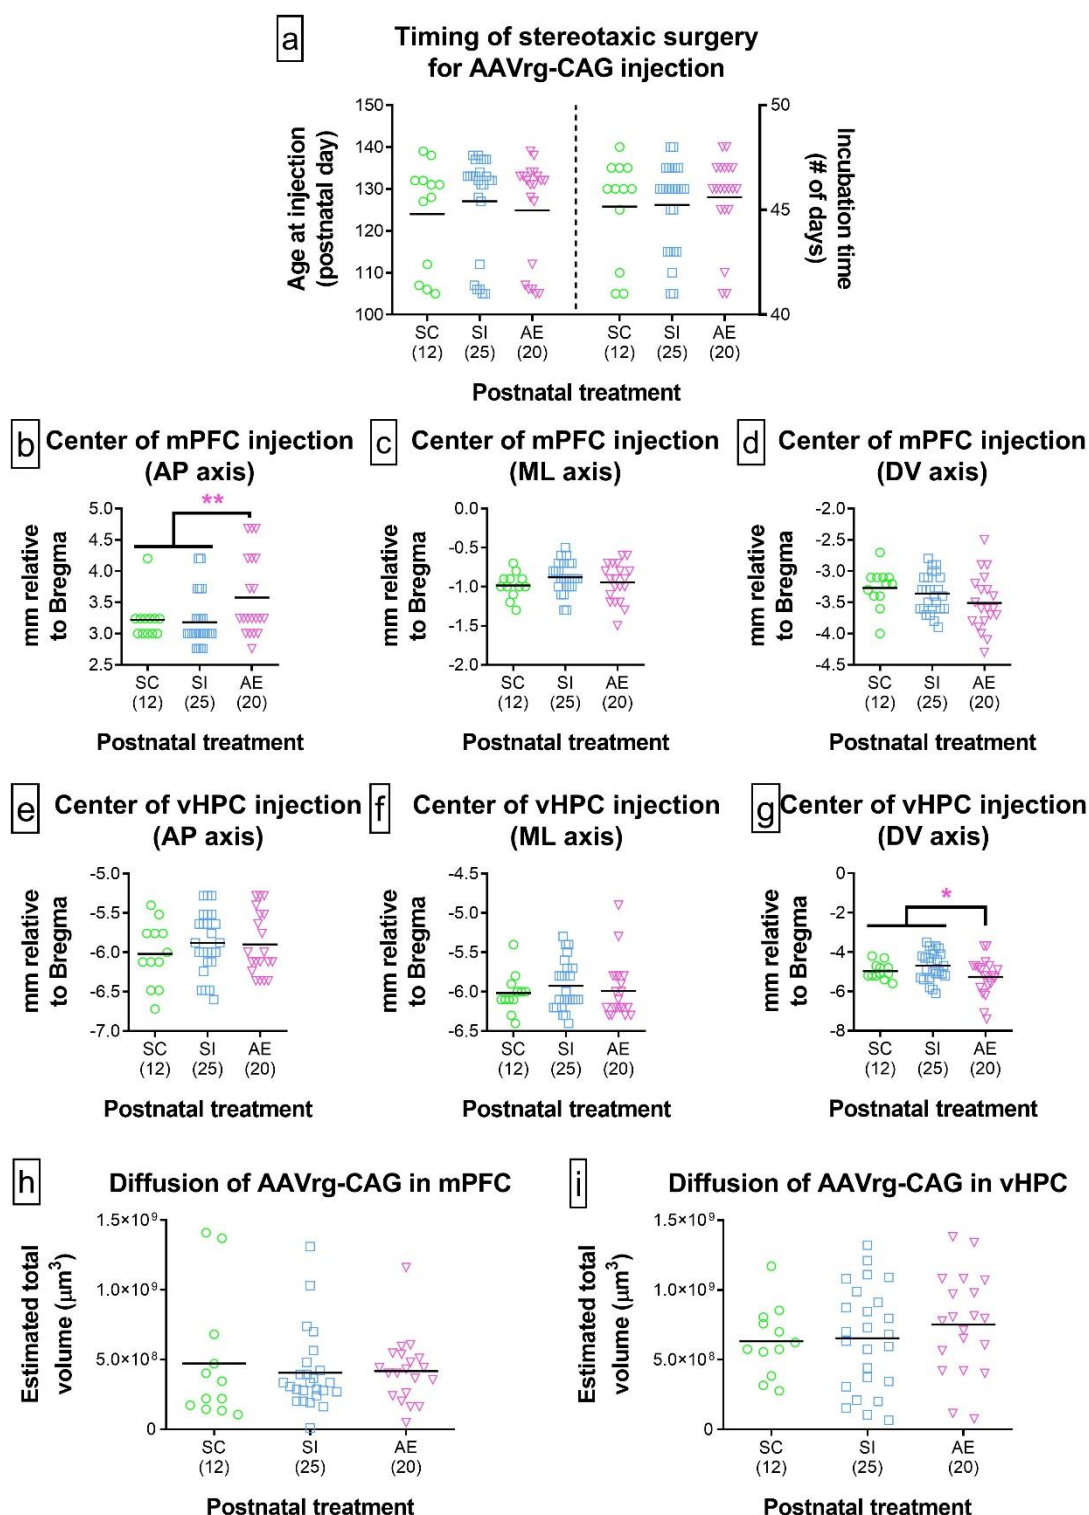

**Figure S2.** Quantification of all injection characteristics and incubation times. (a) Age at AAVrg-CAG injection and amount of incubation time post-injection (i.e., time between injection and tissue fixation); (b–d) Coordinates of mPFC injections along the anterior-posterior (AP) axis (b), the medial-lateral (ML) axis (c), and the dorsal-ventral (DV) axis (d). While the location of injections between postnatal treatment groups was similar among the ML and DV axes, the AP coordinate of AE group appeared slightly further anterior relative to both control groups, likely due to reductions in frontal cortex volume following developmental AE. All coordinates are given in mm relative to Bregma; (e–g) Coordinates of vHPC injections along the AP (e), ML (f), and DV (g) axes. While the location of injections between postnatal treatment groups was similar among the AP and ML axes, the DV coordinate of AE group appeared slightly further ventral relative to both

control groups, likely due to reductions in total brain volume following developmental AE. All coordinates are given in mm relative to Bregma; (**h-i**) Diffusion of AAVrg-CAG injections into mPFC (**h**) and vCA1 (**i**), quantified using unbiased stereological estimation (Cavalieri probe). For all panels in this figure, individual data points represent one animal and are superimposed over bars representing mean within that postnatal treatment. Data include both male and female animals, which are not differentiated due to the lack of sex effects. Sample sizes are given in parentheses below each treatment group. \*  $p \leq 0.050$ , \*\*  $p \leq 0.010$ .

**Table S2.** Regression table for linear mixed-effects model examining age at injection of AAVrg-CAG (left) and number of days between AAVrg-CAG injection and tissue fixation (right). Litter was the only random effect in both models (random-intercept).

| Predictors                                              | Age of AAVrg-CAG injection<br>(postnatal day) |                |          |           | AAVrg-CAG incubation time<br>(days) |              |          |           |
|---------------------------------------------------------|-----------------------------------------------|----------------|----------|-----------|-------------------------------------|--------------|----------|-----------|
|                                                         | Estimates                                     | 95% CI         | <i>p</i> | <i>df</i> | Estimates                           | 95% CI       | <i>p</i> | <i>df</i> |
| (Intercept)                                             | 128.1                                         | 121.0 to 135.2 | <0.001   | 48.0      | 45.2                                | 43.9 to 46.6 | <0.001   | 48.0      |
| SC                                                      | -4.4                                          | -17.0 to 8.2   | 0.495    | 48.0      | 0.3                                 | -2.1 to 2.8  | 0.790    | 48.0      |
| AE                                                      | -0.9                                          | -10.3 to 8.4   | 0.845    | 48.0      | 0.1                                 | -1.3 to 1.6  | 0.870    | 48.0      |
| Male                                                    | -1.5                                          | -11.0 to 8.1   | 0.765    | 48.0      | -0.2                                | -1.7 to 1.2  | 0.743    | 48.0      |
| SC * Male                                               | 4.7                                           | -12.8 to 22.2  | 0.596    | 48.0      | -1.5                                | -4.2 to 1.2  | 0.266    | 48.0      |
| AE * Male                                               | -1.9                                          | -16.5 to 12.7  | 0.797    | 48.0      | -0.1                                | -2.3 to 2.2  | 0.950    | 48.0      |
| Random Effects                                          |                                               |                |          |           |                                     |              |          |           |
| $\sigma^2$                                              | 145.53                                        |                |          |           | 3.35                                |              |          |           |
| $\tau_{00}$                                             | 17.14 Litter                                  |                |          |           | 1.35 Litter                         |              |          |           |
|                                                         | 0.00 mPFC_Fluorophore                         |                |          |           | 0.11 mPFC_Fluorophore               |              |          |           |
| ICC                                                     |                                               |                |          |           | 0.30                                |              |          |           |
| N                                                       | 2 mPFC_Fluorophore                            |                |          |           | 2 mPFC_Fluorophore                  |              |          |           |
|                                                         | 9 Litter                                      |                |          |           | 9 Litter                            |              |          |           |
| Observations                                            | 57                                            |                |          |           | 57                                  |              |          |           |
| Marginal R <sup>2</sup> /<br>Conditional R <sup>2</sup> | 0.019 / NA                                    |                |          |           | 0.034 / 0.327                       |              |          |           |

### S.2.2. Quantification of injection locations

The coordinates of every injection were identified based on the section which possessed the greatest expression of AAV-induced fluorescence. First, the location along the anterior-posterior axis was identified by matching the section to the most similar plate in Paxinos and Watson [75]. The coordinates along the medial-lateral and dorsal-ventral axes were calculated using the relative distance between the midline and most lateral point of the section, and the most dorsal and ventral points of the section, and confirmed by visual inspection using relative location compared to common landmarks (e.g., forceps minor of the corpus collosum and olfactory bulb in PFC; suprapyramidal blade of the dentate gyrus and rhinal sulcus in HPC).

Representative injections of AAVrg-CAG are presented in Figure 2, accompanied by examples of retrograde labeling in Re. The pairing between injection site and fluorophore

(i.e., injection of AAVrg-CAG-tdTomato versus AAVrg-CAG-GFP into mPFC or vHPC) were counterbalanced between treatment groups.

Injections into the mPFC had similar medial-lateral (ML) and dorsal-ventral (DV) coordinates across all treatment groups. The mPFC injections in the AE treatment group appeared further anterior in the brain relative to control groups, likely due to reductions in total brain volume frequently observed following developmental AE in both humans [5, 76] and rats [30,31]. Regardless of this average difference in anterior-posterior (AP) coordinate relative to major brain landmarks, injections were still centered along the dorsal boundary of prelimbic mPFC in all treatment groups. These data are presented in Figure S2b–S2d and Table S3.

While there is evidence of inhomogeneity of thalamic innervation of PFC [77], AP coordinate of mPF injection was not significantly correlated with either the number or percentage of Re→(mPFC+vHPC) neurons ( $p$ 's = 0.864 and 0.693, respectively) or the number or percentage of Re→mPFC neurons ( $p$ 's = 0.616 and 0.636, respectively).

**Table S3.** Regression table for linear mixed-effects model examining stereotaxic coordinate of the center of AAVrg-CAG injection into mPFC along the anterior-posterior axis (left), medial-lateral axis (middle), and dorsal-ventral axis (right). Litter was the only random effect in at three models (random-intercept).

| Predictors                                              | Center of mPFC injection:<br>anterior-posterior coordinate<br>(mm relative to Bregma) |               |        |       | Center of mPFC injection:<br>medial-lateral coordinate<br>(mm relative to Bregma) |                |        |       | Center of mPFC injection:<br>dorsal-ventral coordinate<br>(mm relative to Bregma) |                |        |       |
|---------------------------------------------------------|---------------------------------------------------------------------------------------|---------------|--------|-------|-----------------------------------------------------------------------------------|----------------|--------|-------|-----------------------------------------------------------------------------------|----------------|--------|-------|
|                                                         | Estimates                                                                             | 95% CI        | $p$    | $df$  | Estimates                                                                         | 95% CI         | $p$    | $df$  | Estimates                                                                         | 95% CI         | $p$    | $df$  |
| (Intercept)                                             | 3.25                                                                                  | 2.98 to 3.52  | <0.001 | 49.00 | -0.90                                                                             | -1.02 to -0.79 | <0.001 | 49.00 | -3.42                                                                             | -3.64 to -3.20 | <0.001 | 49.00 |
| SC                                                      | 0.02                                                                                  | -0.47 to 0.51 | 0.945  | 49.00 | -0.09                                                                             | -0.30 to 0.11  | 0.372  | 49.00 | 0.19                                                                              | -0.22 to 0.61  | 0.356  | 49.00 |
| AE                                                      | 0.53                                                                                  | 0.18 to 0.87  | 0.003  | 49.00 | -0.05                                                                             | -0.21 to 0.11  | 0.560  | 49.00 | -0.12                                                                             | -0.37 to 0.13  | 0.352  | 49.00 |
| Male                                                    | -0.13                                                                                 | -0.49 to 0.22 | 0.457  | 49.00 | 0.05                                                                              | -0.11 to 0.22  | 0.542  | 49.00 | 0.18                                                                              | -0.08 to 0.44  | 0.168  | 49.00 |
| SC * Male                                               | -0.01                                                                                 | -0.66 to 0.64 | 0.969  | 49.00 | -0.03                                                                             | -0.34 to 0.27  | 0.846  | 49.00 | -0.18                                                                             | -0.65 to 0.30  | 0.467  | 49.00 |
| AE * Male                                               | -0.37                                                                                 | -0.91 to 0.17 | 0.180  | 49.00 | -0.04                                                                             | -0.30 to 0.21  | 0.743  | 49.00 | 0.02                                                                              | -0.38 to 0.41  | 0.937  | 49.00 |
| Random Effects                                          |                                                                                       |               |        |       |                                                                                   |                |        |       |                                                                                   |                |        |       |
| $\sigma^2$                                              | 0.20                                                                                  |               |        |       | 0.04                                                                              |                |        |       | 0.10                                                                              |                |        |       |
| $\tau_{00}$                                             | 0.03 Litter                                                                           |               |        |       | 0.00 Litter                                                                       |                |        |       | 0.03 Litter                                                                       |                |        |       |
| ICC                                                     | 0.14                                                                                  |               |        |       | 0.06                                                                              |                |        |       | 0.24                                                                              |                |        |       |
| N                                                       | 9 Litter                                                                              |               |        |       | 9 Litter                                                                          |                |        |       | 9 Litter                                                                          |                |        |       |
| Observations                                            | 57                                                                                    |               |        |       | 57                                                                                |                |        |       | 57                                                                                |                |        |       |
| Marginal R <sup>2</sup> /<br>Conditional R <sup>2</sup> | 0.199 / 0.313                                                                         |               |        |       | 0.046 / 0.105                                                                     |                |        |       | 0.096 / 0.317                                                                     |                |        |       |

Injections into the vHPC had similar AP and ML coordinates across all treatment groups ( $p$ 's>0.190). The vHPC injections in the AE treatment group appeared further

ventral in the brain relative to control groups ( $p=0.014$ ), likely due to reductions in total brain volume frequently observed following developmental AE in both humans [5, 76] and rats [30, 31]. Regardless of this average difference in DV coordinate relative to major brain landmarks, injections were still centered ventral CA1 in all treatment groups. These data are presented in Figure S2e–S2g and Table S4

**Table S4.** Regression table for linear mixed-effects model examining stereotaxic coordinate of the center of AAVrg-CAG injection into vHPC along the anterior-posterior axis (left), medial-lateral axis (middle), and dorsal-ventral axis (right). Litter was the only random effect in at three models (random-intercept).

| Predictors                                                 | Center of vHPC injection:<br>anterior-posterior coordinate<br>(mm relative to Bregma) |                    |                  |           | Center of vHPC injection:<br>medial-lateral coordinate<br>(mm relative to Bregma) |                    |                  |           | Center of vHPC injection:<br>dorsal-ventral coordinate<br>(mm relative to Bregma) |                    |                  |           |
|------------------------------------------------------------|---------------------------------------------------------------------------------------|--------------------|------------------|-----------|-----------------------------------------------------------------------------------|--------------------|------------------|-----------|-----------------------------------------------------------------------------------|--------------------|------------------|-----------|
|                                                            | Esti-<br>mates                                                                        | 95% CI             | <i>p</i>         | <i>df</i> | Esti-<br>mates                                                                    | 95% CI             | <i>p</i>         | <i>df</i> | Estimates                                                                         | 95% CI             | <i>p</i>         | <i>df</i> |
| (Intercept)                                                | -5.94                                                                                 | -6.14 to -<br>5.74 | <b>&lt;0.001</b> | 49.00     | -6.02                                                                             | -6.20 to -<br>5.84 | <b>&lt;0.001</b> | 49.00     | -4.90                                                                             | -5.37 to -<br>4.44 | <b>&lt;0.001</b> | 49.00     |
| SC                                                         | -0.21                                                                                 | -0.55 to<br>0.13   | 0.225            | 49.00     | 0.04                                                                              | -0.28 to<br>0.36   | 0.809            | 49.00     | -0.04                                                                             | -0.91 to<br>0.83   | 0.935            | 49.00     |
| AE                                                         | 0.10                                                                                  | -0.20 to<br>0.40   | 0.515            | 49.00     | -0.09                                                                             | -0.32 to<br>0.14   | 0.456            | 49.00     | -0.68                                                                             | -1.21 to -<br>0.14 | <b>0.014</b>     | 49.00     |
| Male                                                       | 0.14                                                                                  | -0.17 to<br>0.45   | 0.387            | 49.00     | 0.19                                                                              | -0.04 to<br>0.43   | 0.110            | 49.00     | 0.40                                                                              | -0.15 to<br>0.95   | 0.150            | 49.00     |
| SC * Male                                                  | 0.25                                                                                  | -0.31 to<br>0.82   | 0.376            | 49.00     | -0.29                                                                             | -0.72 to<br>0.14   | 0.190            | 49.00     | -0.51                                                                             | -1.51 to<br>0.49   | 0.318            | 49.00     |
| AE * Male                                                  | -0.28                                                                                 | -0.75 to<br>0.19   | 0.237            | 49.00     | 0.06                                                                              | -0.30 to<br>0.43   | 0.726            | 49.00     | 0.28                                                                              | -0.57 to<br>1.12   | 0.521            | 49.00     |
| Random Effects                                             |                                                                                       |                    |                  |           |                                                                                   |                    |                  |           |                                                                                   |                    |                  |           |
| $\sigma^2$                                                 |                                                                                       | 0.15               |                  |           |                                                                                   | 0.09               |                  |           |                                                                                   | 0.47               |                  |           |
| $\tau_{00}$                                                |                                                                                       | 0.00 Litter        |                  |           |                                                                                   | 0.01 Litter        |                  |           |                                                                                   | 0.15 Litter        |                  |           |
| ICC                                                        |                                                                                       |                    |                  |           |                                                                                   | 0.13               |                  |           |                                                                                   | 0.24               |                  |           |
| N                                                          |                                                                                       | 9 Litter           |                  |           |                                                                                   | 9 Litter           |                  |           |                                                                                   | 9 Litter           |                  |           |
| Observations                                               |                                                                                       | 57                 |                  |           |                                                                                   | 57                 |                  |           |                                                                                   | 57                 |                  |           |
| Marginal R <sup>2</sup> /<br>Conditional<br>R <sup>2</sup> |                                                                                       | 0.085 / NA         |                  |           |                                                                                   | 0.102 / 0.218      |                  |           |                                                                                   | 0.167 / 0.366      |                  |           |

There were no significant differences in the diffusion of AAVrg-CAG in mPFC (Figure S2h) or vHPC (Figure S2i) between treatment groups or sexes. These results are presented in Table S5.

**Table S5.** Regression table for linear mixed-effects model examining diffusion of AAVrg-CAG injections into mPFC (left) and vHPC (right). Litter (random-intercept) and fluorophore-site pairing (random-intercept) were the random effects in both models.

Diffusion of AAVrg-CAG in mPFC ( $\mu\text{m}^3$ )

Diffusion of AAVrg-CAG in vHPC ( $\mu\text{m}^3$ )

| Predictors                                              | Estimates                   | 95% CI                  | p      | df | Estimates             | 95% CI                  | p      | df |
|---------------------------------------------------------|-----------------------------|-------------------------|--------|----|-----------------------|-------------------------|--------|----|
| (Intercept)                                             | 407473018                   | 212969499 to 601976537  | <0.001 | 48 | 590400000             | 407207584 to 773592416  | <0.001 | 48 |
| SC                                                      | 99029812                    | -266135073 to 464194697 | 0.595  | 48 | 15600000              | -288190254 to 319390254 | 0.920  | 48 |
| AE                                                      | 1160682                     | -221202390 to 223523754 | 0.992  | 48 | 190400000             | -79251935 to 460051935  | 0.166  | 48 |
| Male                                                    | 39487739                    | -186416705 to 265392183 | 0.732  | 48 | 145309091             | -130863868 to 421482049 | 0.302  | 48 |
| SC * Male                                               | 58809432                    | -356237209 to 473856072 | 0.781  | 48 | -62509091             | -564961750 to 439943568 | 0.807  | 48 |
| AE * Male                                               | 71696599                    | -276304082 to 419697279 | 0.686  | 48 | -212109091            | -629425835 to 205207653 | 0.319  | 48 |
| Random Effects                                          |                             |                         |        |    |                       |                         |        |    |
| $\sigma^2$                                              | 80786528076139248.00        |                         |        |    | 122305738609623232.00 |                         |        |    |
| $\tau_{00}$                                             | 27004016396804432.00 Litter |                         |        |    | 3236.26 Litter        |                         |        |    |
|                                                         | 0.00 mPFC_Fluorophore       |                         |        |    | 0.00 vHPC_Fluorophore |                         |        |    |
| N                                                       | 2 mPFC_Fluorophore          |                         |        |    | 2 vHPC_Fluorophore    |                         |        |    |
|                                                         | 9 Litter                    |                         |        |    | 9 Litter              |                         |        |    |
| Observations                                            | 57                          |                         |        |    | 57                    |                         |        |    |
| Marginal R <sup>2</sup> /<br>Conditional R <sup>2</sup> | 0.043 / NA                  |                         |        |    | 0.045 / NA            |                         |        |    |

### S.2.3. Analysis of AE-induced changes in Re→(mPFC+vHPC) projection neuron representation after controlling for injection properties

The current study found that AE increased the proportion of Re→(mPFC+vHPC) projection neurons, but not Re neurons projecting to either mPFC or vHPC alone. We confirmed this finding by running the same analyses in Tables 4–6 and controlling for the incubation time (fixed-effect), diffusion of AAVrg-CAG in each respective injection site (fixed effects), and fluorophore-injection site pairing (random-intercept). These analyses show similar statistical outcomes regardless of whether injection properties were controlled for, and are presented in Tables S6–S8, below.

**Table S6.** Regression table for Re→ (mPFC+vHPC) projection neurons, adding additional control predictors to the analysis from Table 4.

| # of projection neurons:<br>Re→(mPFC+vHPC)<br>(controlling for injection parameters) |           |                       |       |        | % of total Re neurons:<br>Re→(mPFC+vHPC)<br>(controlling for injection parameters) |                   |       |        |  |
|--------------------------------------------------------------------------------------|-----------|-----------------------|-------|--------|------------------------------------------------------------------------------------|-------------------|-------|--------|--|
| Predictors                                                                           | Estimates | 95% CI                | p     | df     | Estimates                                                                          | 95% CI            | p     | df     |  |
| (Intercept)                                                                          | 585.514   | -1986.959 to 3157.986 | 0.656 | 44.000 | -6.697                                                                             | -23.955 to 10.560 | 0.447 | 44.000 |  |
| SC                                                                                   | 43.604    | -537.358 to 624.566   | 0.883 | 44.000 | 0.464                                                                              | -3.900 to 4.827   | 0.835 | 44.000 |  |

|                                                      |                       |                     |       |        |        |                       |              |        |
|------------------------------------------------------|-----------------------|---------------------|-------|--------|--------|-----------------------|--------------|--------|
| AE                                                   | 119.294               | -141.061 to 379.649 | 0.369 | 44.000 | 2.271  | 0.566 to 3.976        | <b>0.009</b> | 44.000 |
| Male                                                 | 135.680               | -128.562 to 399.921 | 0.314 | 44.000 | 0.938  | -0.791 to 2.668       | 0.287        | 44.000 |
| IncubationTime                                       | -4.175                | -60.613 to 52.264   | 0.885 | 44.000 | 0.209  | -0.169 to 0.587       | 0.279        | 44.000 |
| mPFC_Diffusion                                       | -64.300               | -177.378 to 48.778  | 0.265 | 44.000 | -0.043 | -0.800 to 0.713       | 0.911        | 44.000 |
| vHPC_Diffusion                                       | -1.840                | -98.457 to 94.778   | 0.970 | 44.000 | -0.517 | -1.150 to 0.117       | 0.110        | 44.000 |
| SC * Male                                            | -281.139              | -763.418 to 201.139 | 0.253 | 44.000 | -1.551 | -4.709 to 1.607       | 0.336        | 44.000 |
| AE * Male                                            | -325.318              | -744.785 to 94.150  | 0.128 | 44.000 | -2.541 | -5.290 to 0.208       | 0.070        | 44.000 |
| mPFC_Diffusion *<br>vHPC_Diffusion                   | -13.328               | -111.713 to 85.057  | 0.791 | 44.000 | -0.507 | -1.154 to 0.140       | 0.124        | 44.000 |
| Random Effects                                       |                       |                     |       |        |        |                       |              |        |
| $\sigma^2$                                           | 104323.44             |                     |       |        |        | 4.46                  |              |        |
| $\tau_{00}$                                          | 99091.74 Litter       |                     |       |        |        | 6.09 Litter           |              |        |
|                                                      | 0.00 mPFC_Fluorophore |                     |       |        |        | 0.00 mPFC_Fluorophore |              |        |
| ICC                                                  |                       |                     |       |        |        | 0.58                  |              |        |
| N                                                    | 2 mPFC_Fluorophore    |                     |       |        |        | 2 mPFC_Fluorophore    |              |        |
|                                                      | 9 Litter              |                     |       |        |        | 9 Litter              |              |        |
| Observations                                         | 57                    |                     |       |        |        | 57                    |              |        |
| Marginal R <sup>2</sup> / Conditional R <sup>2</sup> | 0.108 / NA            |                     |       |        |        | 0.116 / 0.626         |              |        |

**Table S7.** Regression table for Re→mPFC projection neurons, adding additional control predictors to the analysis from Table 5.

| Predictors     | # of projection neurons:<br>Re→mPFC<br>(controlling for injection parameters) |                       |       |        | % of total Re neurons:<br>Re→mPFC<br>(controlling for injection parameters) |                  |       |        |
|----------------|-------------------------------------------------------------------------------|-----------------------|-------|--------|-----------------------------------------------------------------------------|------------------|-------|--------|
|                | Estimates                                                                     | 95% CI                | p     | df     | Estimates                                                                   | 95% CI           | p     | df     |
| (Intercept)    | -697.215                                                                      | -2723.583 to 1329.152 | 0.500 | 46.000 | -7.713                                                                      | -24.556 to 9.130 | 0.369 | 46.000 |
| SC             | 23.048                                                                        | -248.817 to 294.914   | 0.868 | 46.000 | 0.179                                                                       | -2.074 to 2.431  | 0.876 | 46.000 |
| AE             | -17.708                                                                       | -259.398 to 223.982   | 0.886 | 46.000 | 0.520                                                                       | -1.482 to 2.523  | 0.610 | 46.000 |
| Male           | -129.263                                                                      | -376.611 to 118.086   | 0.306 | 46.000 | -0.933                                                                      | -2.983 to 1.116  | 0.372 | 46.000 |
| IncubationTime | 22.653                                                                        | -21.187 to 66.493     | 0.311 | 46.000 | 0.227                                                                       | -0.137 to 0.590  | 0.222 | 46.000 |
| mPFC_Diffusion | -85.183                                                                       | -172.772 to 2.407     | 0.057 | 46.000 | -0.719                                                                      | -1.445 to 0.007  | 0.052 | 46.000 |
| SC * Male      | 205.484                                                                       | -250.987 to 661.955   | 0.378 | 46.000 | 1.430                                                                       | -2.351 to 5.212  | 0.459 | 46.000 |



|                                                         |                           |                     |       |        |                       |                 |       |        |
|---------------------------------------------------------|---------------------------|---------------------|-------|--------|-----------------------|-----------------|-------|--------|
| AE * Male                                               | 190.927                   | -182.271 to 564.125 | 0.316 | 46.000 | 2.126                 | -0.965 to 5.218 | 0.178 | 46.000 |
| Random Effects                                          |                           |                     |       |        |                       |                 |       |        |
| $\sigma^2$                                              | 97188.46                  |                     |       |        | 6.67                  |                 |       |        |
| $\tau_{00}$                                             | 0.00 Litter               |                     |       |        | 0.00 Litter           |                 |       |        |
|                                                         | 42893.70 mPFC_Fluorophore |                     |       |        | 3.55 mPFC_Fluorophore |                 |       |        |
| N                                                       | 2 mPFC_Fluorophore        |                     |       |        | 2 mPFC_Fluorophore    |                 |       |        |
|                                                         | 9 Litter                  |                     |       |        | 9 Litter              |                 |       |        |
| Observations                                            | 57                        |                     |       |        | 57                    |                 |       |        |
| Marginal R <sup>2</sup> /<br>Conditional R <sup>2</sup> | 0.111 / NA                |                     |       |        | 0.159 / NA            |                 |       |        |

**Table S8.** Regression table for Re→vHPC projection neurons, adding additional control predictors to the analysis from Table 5.

| Predictors     | # of projection neurons:<br>Re→vHPC<br>(controlling for injection parameters) |                       |              |        | % of total Re neurons:<br>Re→vHPC<br>(controlling for injection parameters) |                   |       |        |
|----------------|-------------------------------------------------------------------------------|-----------------------|--------------|--------|-----------------------------------------------------------------------------|-------------------|-------|--------|
|                | Estimates                                                                     | 95% CI                | p            | df     | Estimates                                                                   | 95% CI            | p     | df     |
| (Intercept)    | 8012.884                                                                      | 1521.502 to 14504.266 | <b>0.016</b> | 46.000 | 2.241                                                                       | -34.641 to 39.123 | 0.905 | 46.000 |
| SC             | 1024.337                                                                      | -1066.736 to 3115.410 | 0.337        | 46.000 | 7.715                                                                       | -6.303 to 21.734  | 0.281 | 46.000 |
| AE             | -494.043                                                                      | -1179.397 to 191.311  | 0.158        | 46.000 | 1.710                                                                       | -2.069 to 5.490   | 0.375 | 46.000 |
| Male           | -203.009                                                                      | -887.162 to 481.143   | 0.561        | 46.000 | -0.011                                                                      | -3.780 to 3.758   | 0.996 | 46.000 |
| IncubationTime | -138.187                                                                      | -278.445 to 2.070     | 0.053        | 46.000 | 0.183                                                                       | -0.595 to 0.961   | 0.644 | 46.000 |
| vHPC_Diffusion | 44.844                                                                        | -207.682 to 297.370   | 0.728        | 46.000 | -1.207                                                                      | -2.601 to 0.188   | 0.090 | 46.000 |
| SC * Male      | -673.099                                                                      | -1928.386 to 582.188  | 0.293        | 46.000 | -6.620                                                                      | -13.538 to 0.297  | 0.061 | 46.000 |
| AE * Male      | 142.666                                                                       | -926.204 to 1211.537  | 0.794        | 46.000 | 0.603                                                                       | -5.295 to 6.501   | 0.841 | 46.000 |
| Random Effects |                                                                               |                       |              |        |                                                                             |                   |       |        |
| $\sigma^2$     | 710794.91                                                                     |                       |              |        | 21.55                                                                       |                   |       |        |
| $\tau_{00}$    | 1521485.90 Litter                                                             |                       |              |        | 71.99 Litter                                                                |                   |       |        |
|                | 314428.91 vHPC_Fluorophore                                                    |                       |              |        | 35.96 vHPC_Fluorophore                                                      |                   |       |        |
| ICC            | 0.72                                                                          |                       |              |        | 0.83                                                                        |                   |       |        |
| N              | 2 vHPC_Fluorophore                                                            |                       |              |        | 2 vHPC_Fluorophore                                                          |                   |       |        |
|                | 9 Litter                                                                      |                       |              |        | 9 Litter                                                                    |                   |       |        |
| Observations   | 57                                                                            |                       |              |        | 57                                                                          |                   |       |        |

Marginal  $R^2$  /  
Conditional  $R^2$

0.111 / 0.752

0.061 / 0.844
